# Supplementary material for: Label free detection of specific protein binding using a microwave sensor
Source: Royal Society of Chemistry journal article supplement (doi:10.1039/c4an00909f), 2014-01-01
Supplement: c4an00909f1.pdf [file c4an00909f1.pdf]

## Supporting Information

### **Label free detection of specific protein binding using a microwave sensor**

*Marcela Salazar-Alvarez<sup>a</sup>, Olga Korostynska<sup>b</sup>, Alex Mason<sup>b</sup>, Ahmed Al-Shamma'a<sup>b</sup>, Jakki C. Cooney<sup>c</sup>, Edmond Magner<sup>a,\*</sup>, Syed A.M. Tofail<sup>d,\*</sup>*

<sup>a</sup>Department of Chemical and Environmental Science & Materials and Surface Science Institute, University of Limerick, Limerick, Ireland

<sup>b</sup>BEST Research Institute, School of Built Environment, Liverpool John Moores University, Liverpool, UK, L3 3AF

<sup>c</sup>Department of Life Sciences and Materials & Surface Science Institute, University of Limerick, Limerick, Ireland

<sup>d</sup>Materials and Surface Science Institute, University of Limerick, Limerick, Ireland

### **Corresponding Authors**

\* Department of Chemical and Environmental Sciences & Materials and Surface Science Institute, University of Limerick, Limerick, Ireland .E-mail: edmond.magner@ul.ie

\* Materials and Surface Science Institute, University of Limerick, Limerick, Ireland. E-mail: tofail.syed@ul.ie

## Experimental

### *Materials*

3,3'-Dithiodipropionic acid di(N-hydroxysuccinimide ester) (DSP), dimethyl sulfoxide (DMSO), protein A–biotin from *Staphylococcus aureus*, 3,3',5,5'-tetramethylbenzidine (TMB) peroxidase substrate, Tween-20, cytochrome c and glucose oxidase were purchased from Sigma-Aldrich. Streptavidin-horseradish peroxidase and ethanolamine hydrochloride were purchased from GE Healthcare Lifesciences. Hydroxyapatite powders were obtained from Cambioceramics. All solutions were prepared using ultrapure water (resistivity of 18.2 M $\Omega$  cm) prepared using an Elgastat maxima system (Elga, UK).

### *Substrate Preparation*

One side of silicon wafer slides (5 mm x7 mm) were sputtered with a layer of titanium (~2 nm) followed by a layer of gold (~50 nm) using an ORION-5-UHV sputtering system. The gold slides were cleaned in (70 % v/v) nitric acid for 15 min at room temperature. The substrates were thoroughly rinsed with ultrapure water and air dried.

### *Gold surface modification*

The clean gold substrates were immersed in 2 mM DSP in DMSO for 2 h at room temperature in order to create a thiol layer. The slides were then rinsed with DMSO, followed by rinsing with a solution of phosphate buffered saline (PBS, 10 mM sodium phosphate, 137 mM NaCl at pH 7.2). The protein A layer was covalently attached to the thiol linked gold substrates by incubating the slides overnight at 4 °C in a protein A-biotin solution (0.5 mg/ml) in PBS at pH 7.4. The surfaces were then blocked by incubation in a solution of ethanolamine hydrochloride (1M), pH 8.6, for 1 h. After thorough washing with PBST (PBS with 1% Tween 20, pH 7.2) the substrates were incubated in a PBST solution containing 1.2  $\mu$ g/ml streptavidin-HRP for 2h. Thiol modified gold substrates were blocked with a solution of ethanolamine hydrochloride (1M), pH 8.6, for 1 h and then incubated in 1.2  $\mu$ g/ml streptavidin-HRP in PBST solution for 2 h as a control. 3,3',5,5' Tetramethylbenzidine (TMB) peroxidase substrate was added as a substrate for the detection of HRP.

### *Hydroxyapatite film preparation*

Hydroxyapatite (HA) powders were mixed with a binder polyvinyl butyral (PVB) together with diethylene glycolbutyl-ether as solvent. The HA paste was then smeared over glass slides using a glass microscope slide as a squeegee. The obtained films were dried at 200°C for 10-15 min and then calcined (ramp rate of 5°C/min and for 1 hour at 700°C) to remove the solvent and the binder.

### *HA surface modification*

HA films were immersed in a 20  $\mu$ M solution of cytochrome c in 10 mM KH<sub>2</sub>PO<sub>4</sub> buffer, pH 7.0 and in a 20  $\mu$ M solution of glucose oxidase in 10 mM C<sub>2</sub>H<sub>3</sub>NaO<sub>2</sub> buffer, pH 5.0.

### *SEM characterization*

SEM images of the HA films were obtained using a Hitachi SU-70 (accelerating volt of 10 keV) equipped with an energy dispersive X-ray spectrometer. Thin films of gold were deposited on HA films to reduce charging effects.

#### *Microwave measurements*

A pattern with interdigitated electrodes (IDE) printed on Rogers® substrate was attached to a Rohde and Schwarz ZVA24 vector network analyzer (VNA) via a coaxial cable as described previously<sup>1</sup>. The reflected signal ( $S_{11}$ ) was recorded for all samples (60,000 points for each measurement) over the frequency range 0.01-15 GHz. All measurements were made in air.

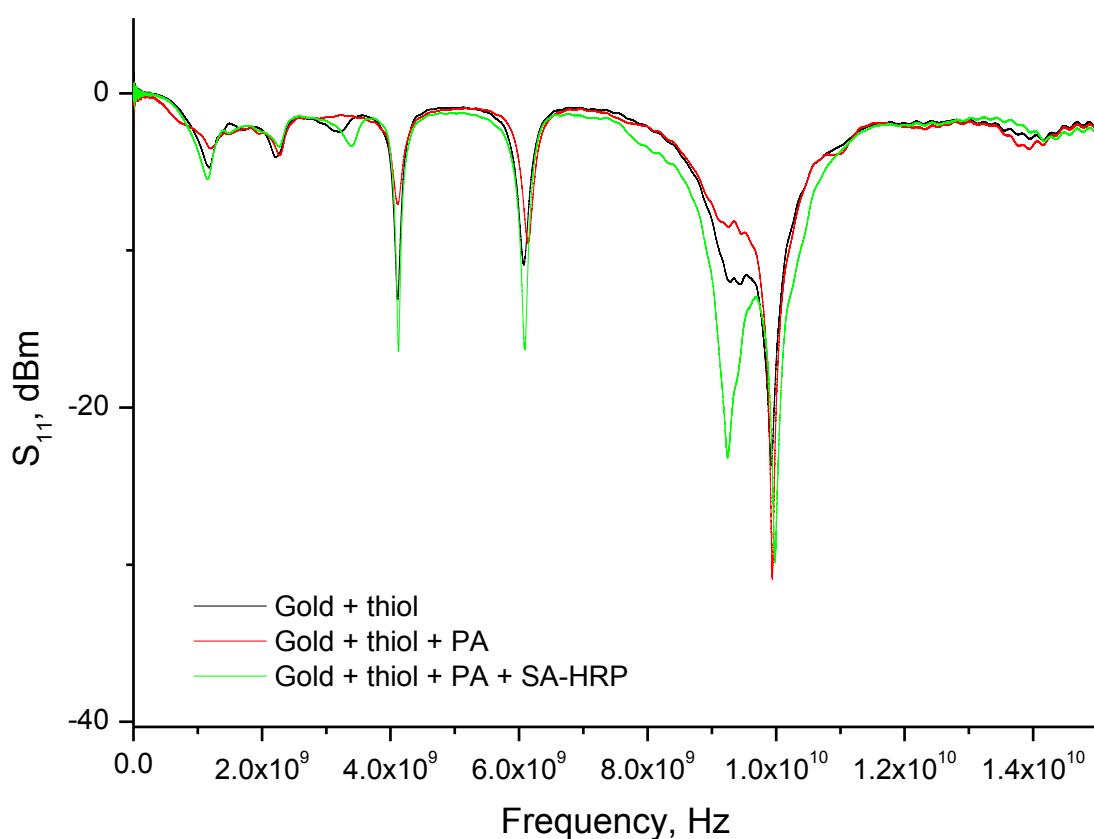

Fig. S1. Reflected signal ( $S_{11}$ ) response obtained for a thiol modified gold surface which was subsequently modified with protein A-biotin and with streptavidin-HRP.

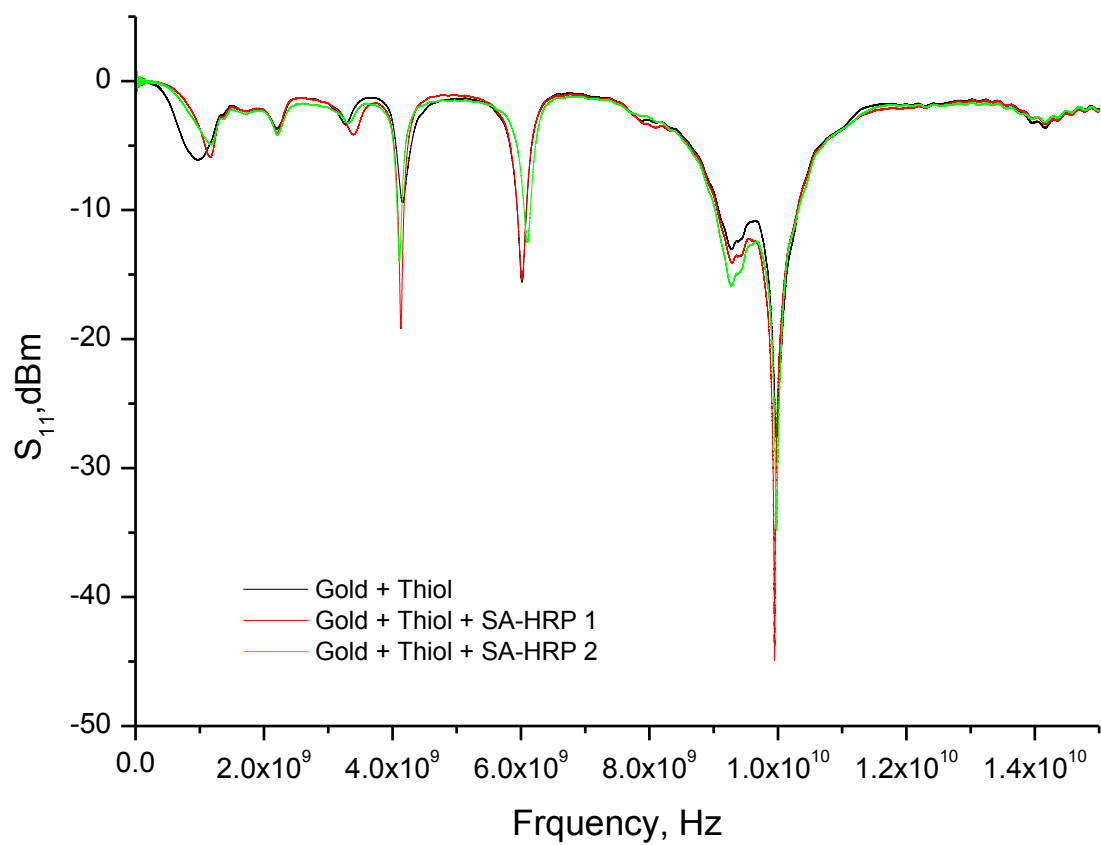

Fig. S2. Reflected signal ( $S_{11}$ ) response obtained for a thiol modified gold surface which was subsequently modified with protein A-biotin and with streptavidin-HRP.

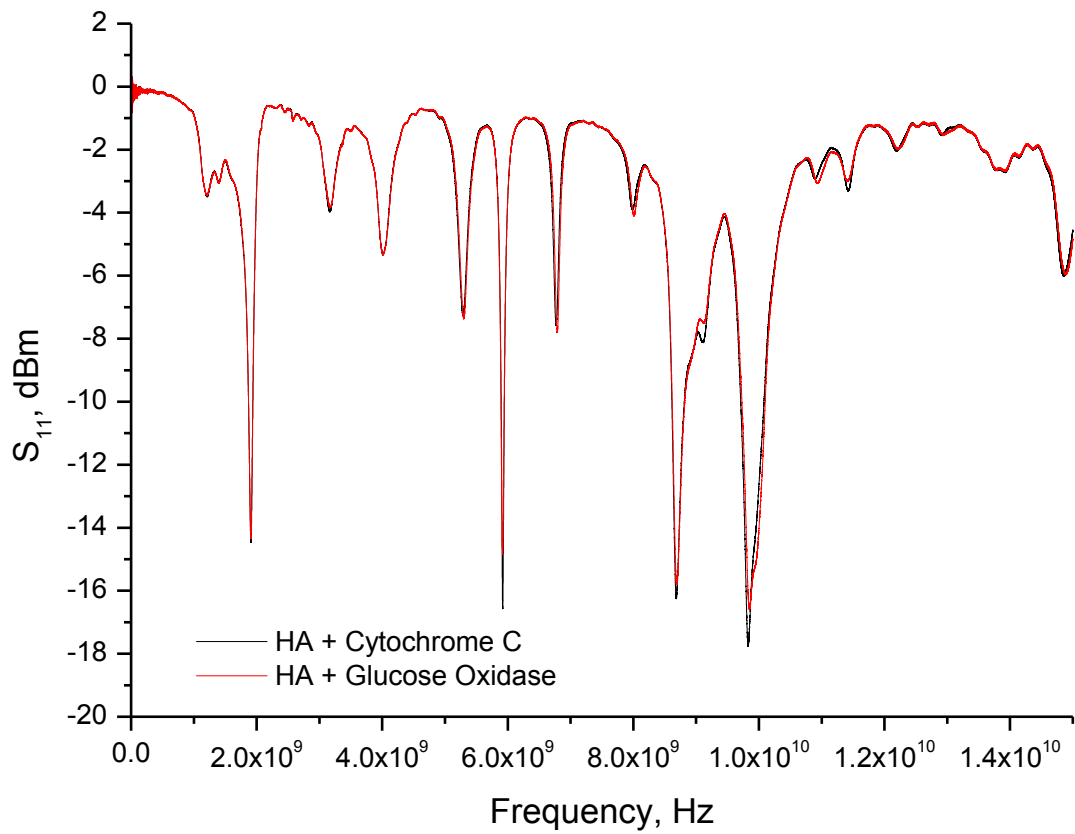

Fig. S3. Reflected signal ( $S_{11}$ ) signal response obtained for a HA modified gold surface with bound glucose oxidase and cytochrome c.

1. O. Korostynska, I. Nakouti, A. Mason and A. I. Al-Shamma'a, Sensing Technology (ICST), 2013 Seventh International Conference on, 2013.
